# Supplementary material for: In Situ Ruthenium Catalyst Modification for the Conversion of Furfural to 1,2-Pentanediol
Source: MDPI journal article supplement (doi:10.3390/nano12030328), 2022-01-20
Supplement: s1 [file s1]

# Supplementary Materials

## In Situ Ruthenium Catalyst Modification for the Conversion of Furfural to 1,2-Pentanediol

Lauriane Bruna, Miquel Cardona-Farreny, Vincent Colliere, Karine Philippot and M. Rosa Axet \*

CNRS, LCC (Laboratoire de Chimie de Coordination), Université de Toulouse, UPS, INPT,  
205 route de Narbonne, CEDEX 04, 31077 Toulouse, France;  
bruna.lauriane98@gmail.com (L.B.);  
miquel.cardona@lcc-toulouse.fr (M.C.-F.); vincent.colliere@lcc-toulouse.fr (V.C.);  
karine.philippot@lcc-toulouse.fr (K.P.)  
\* Correspondence: rosa.axet@lcc-toulouse.fr

### Fraction of surface atoms

The number of Ru atoms in *hcp* cell ( $N$ ) is 6. Ru atom radius ( $R_{Ru}$ ) is 0.214 nm. The volume of Ru cell is 0.0817 nm<sup>3</sup>.  $R_{NP}$  represents the radius of a NP, determined using TEM images.

The volume of all Ru atoms on the shell of NP:  $V_{shell} = V_{total} - V_{core} = \frac{4}{3}\pi R_{NP}^3 - \frac{4}{3}\pi (R_{NP} - R_{Ru})^3$ ,  
 $V_{total}$  meaning the volume of one Ru nanoparticle,  $V_{core}$  presenting the volume of NP excluded the one outer layer of atoms.

The numbers of metal atoms on the shell  $N_{shell} = N \cdot V_{shell} / 0.0817$ .

The number of total Ru atoms  $N_{total} = N \cdot V_{total} / 0.0817$ .

The percentage of Ru atoms on the surface of NP =  $N_{shell} / N_{total} \cdot 100\%$ .

Taking into consideration these calculations for a 1.6 nm Ru NP the % of Ru surface atoms is 61.

Arblaster, J. W., Crystallographic properties of ruthenium. *Platinum Met. Rev.* **2013**, 57, 127-136.

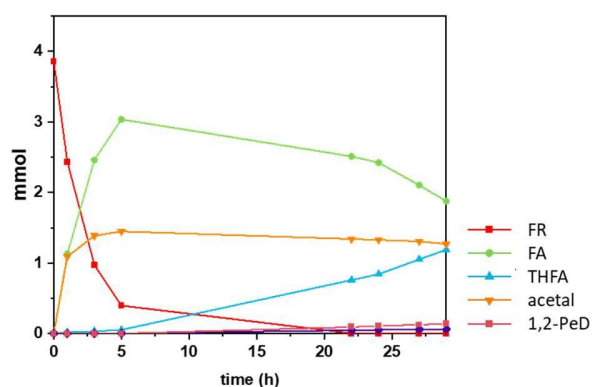

**Figure S1.** Time-concentration curve for furfural hydrogenation using Ru/PVP as catalyst. Furfural (red curve), furfuryl alcohol (green curve), tetrahydrofurfuryl alcohol (blue curve), acetal (orange curve), 1,2-pentanediol (pink curve). Reaction conditions:  $2 \times 10^{-2}$  mmol of Ru, 4 mmol of FA, 0.5 mmol of dodecane (internal standard), 20 bar of  $H_2$ , 125°C, 15 mL of 1-propanol. Quantities of products and reagents were determined by GC using an internal standard technique.

M. Cardona-Farreny, P. Lecante, J. Esvan, C. Dinoi, I. Del Rosal, R. Poteau, K. Philippot, M.R. Axet, Bimetallic RuNi nanoparticles as catalysts for upgrading biomass: metal dilution and solvent effects on selectivity shifts, *Green Chem.*, 23 (2021) 8480-8500.

**Table S1.** Size before and after the hydrogenation of furfural in 1-PrOH using Ru/PVP nanocatalyst in situ modified.

| Entry | Catalyst     | Size before reaction<br>(nm) <sup>a</sup> | Size after reaction<br>(nm) <sup>a</sup> | Leaching<br>(%) <sup>b</sup> |
|-------|--------------|-------------------------------------------|------------------------------------------|------------------------------|
| 1     | Ru/PVP       | 1.6 ± 0.3                                 | 1.6 ± 0.3                                | 0.8                          |
| 2     | Ru/PVP + HDA |                                           | 1.5 ± 0.3                                | 1.6                          |
| 3     | Ru/PVP + TMP |                                           | 1.6 ± 0.4                                | 3.0                          |
| 4     | Ru/PVP + TBA |                                           | 1.4 ± 0.4                                | 1.3                          |
| 5     | Ru/PVP + PN  |                                           | 1.6 ± 0.4                                | 0.1                          |
| 6     | Ru/PVP + NHC |                                           | 1.7 ± 0.4                                | 2.9                          |

<sup>a</sup>Mean values of nanoparticle size determined from TEM images by considering at least 200 particles.

<sup>b</sup>Determined by ICP analysis.

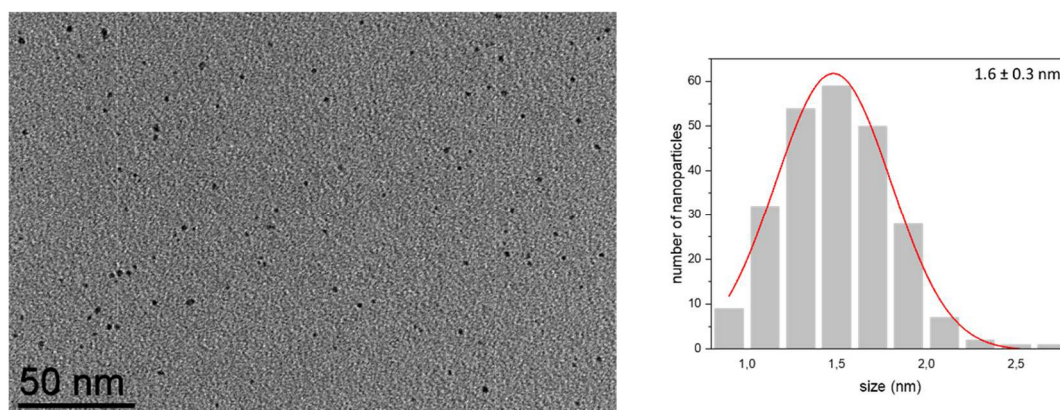

**Figure S2.** TEM image of Ru/PVP (scale bar 50 nm) together with the respective size histogram.

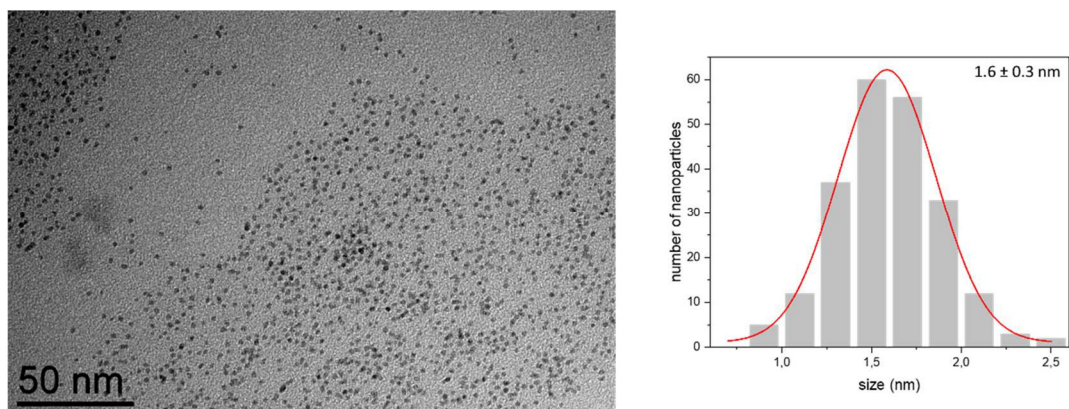

**Figure S3.** TEM image of Ru/PVP after the hydrogenation of furfural in 1-PrOH at 20 bar of H<sub>2</sub> pressure (scale bar 50 nm) together with the respective size histogram.

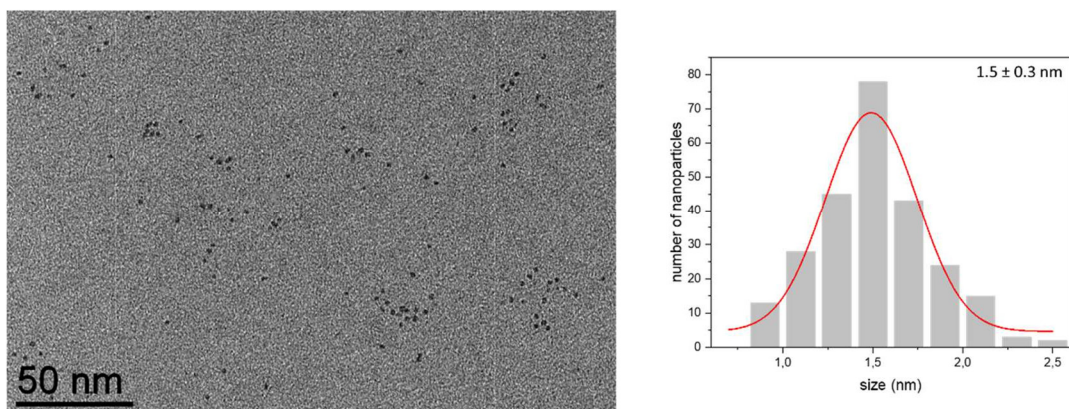

**Figure S4.** TEM image of Ru/PVP after the hydrogenation of furfural in 1-PrOH at 20 bar of H<sub>2</sub> pressure in the presence of HDA (scale bar 50 nm) together with the respective size histogram.

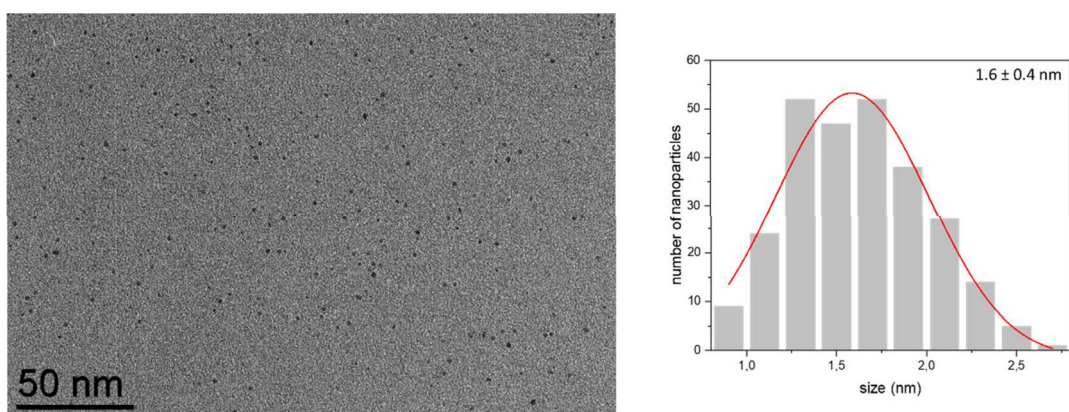

**Figure S5.** TEM image of Ru/PVP after the hydrogenation of furfural in 1-PrOH at 20 bar of H<sub>2</sub> pressure in the presence of TMP (scale bar 50 nm) together with the respective size histogram.



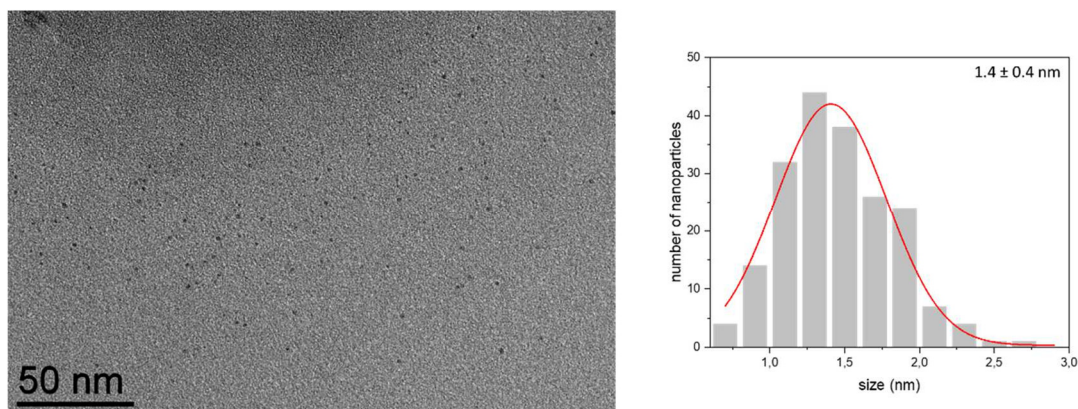

**Figure S6.** TEM image of Ru/PVP after the hydrogenation of furfural in 1-PrOH at 20 bar of H<sub>2</sub> pressure in the presence of TBA (scale bar 50 nm) together with the respective size histogram.

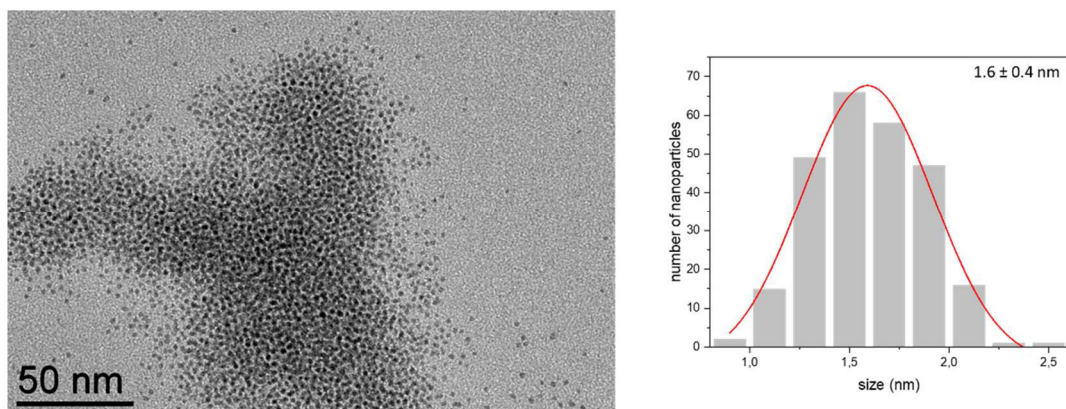

**Figure S7.** TEM image of Ru/PVP after the hydrogenation of furfural in 1-PrOH at 20 bar of H<sub>2</sub> pressure in the presence of PN (scale bar 50 nm) together with the respective size histogram.

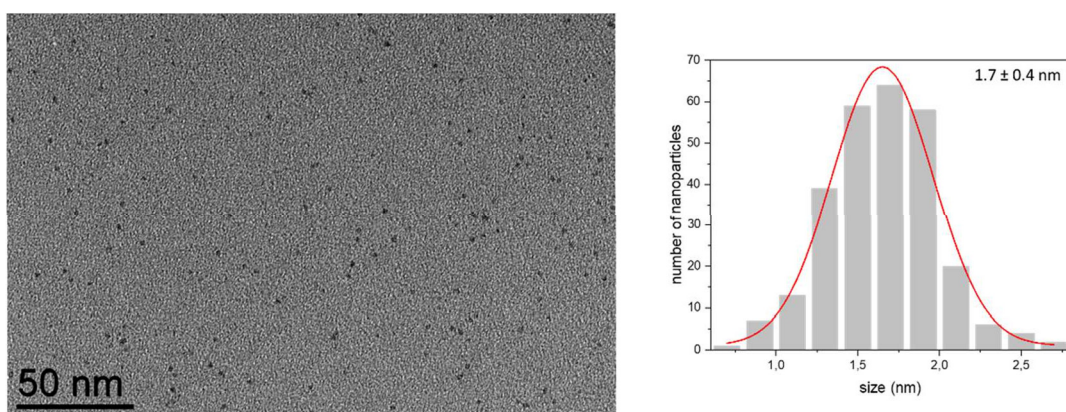

**Figure S8.** TEM image of Ru/PVP after the hydrogenation of furfural in 1-PrOH at 20 bar of H<sub>2</sub> pressure in the presence of NHC (scale bar 50 nm) together with the respective size histogram.
